# Supplementary material for: Survival during influenza-associated bacterial superinfection improves following viral- and bacterial-specific monoclonal antibody treatment
Source: JCI journal article supplement (doi:10.1172/jci.insight.125554), 2019-07-24
Supplement: sd1 [file 1]

# Supplemental Figure 1

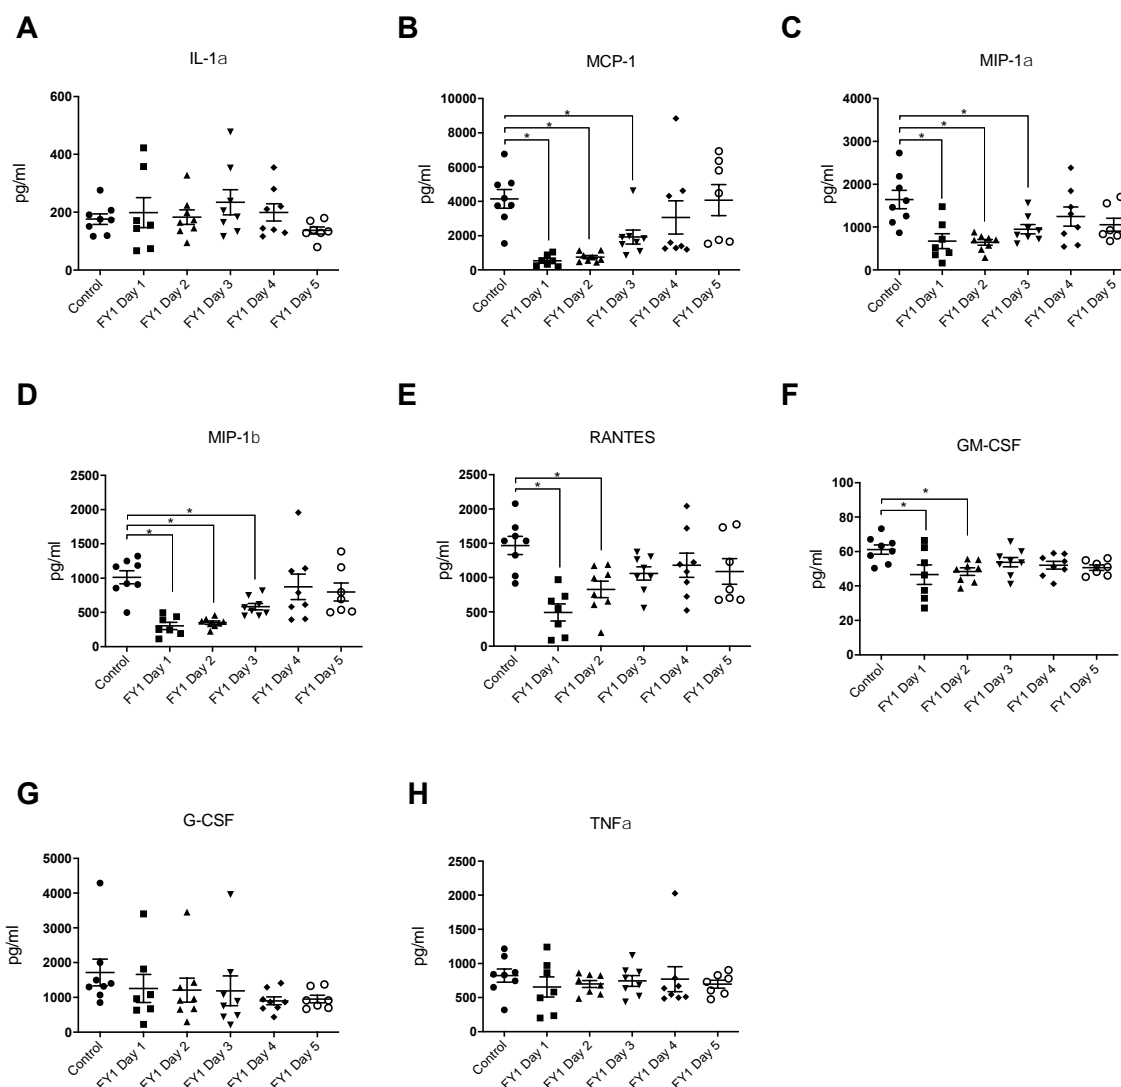

Supplemental Figure 1. **Influenza HA targeting monoclonal antibody suppresses both inflammatory and anti-inflammatory cytokines in the lung during influenza-associated bacterial pneumonia.** C57BL/6 mice infected with 100 PFU of influenza A PR/8/34 and receiving a single dose of FY1 or IgG control on Days 1-5 post-influenza infection. Mice received secondary infection with  $5 \times 10^7$  CFU of MRSA on Day 6 post-influenza and samples were harvested 24 hours following bacterial infection. A-F, Cytokine and chemokine concentrations in lung tissue measured by Lincoplex (n=8). Significance was tested by one-way ANOVA using Dunnett's multiple comparison test. Data represent mean  $\pm$  SEM.

## Supplemental Figure 2

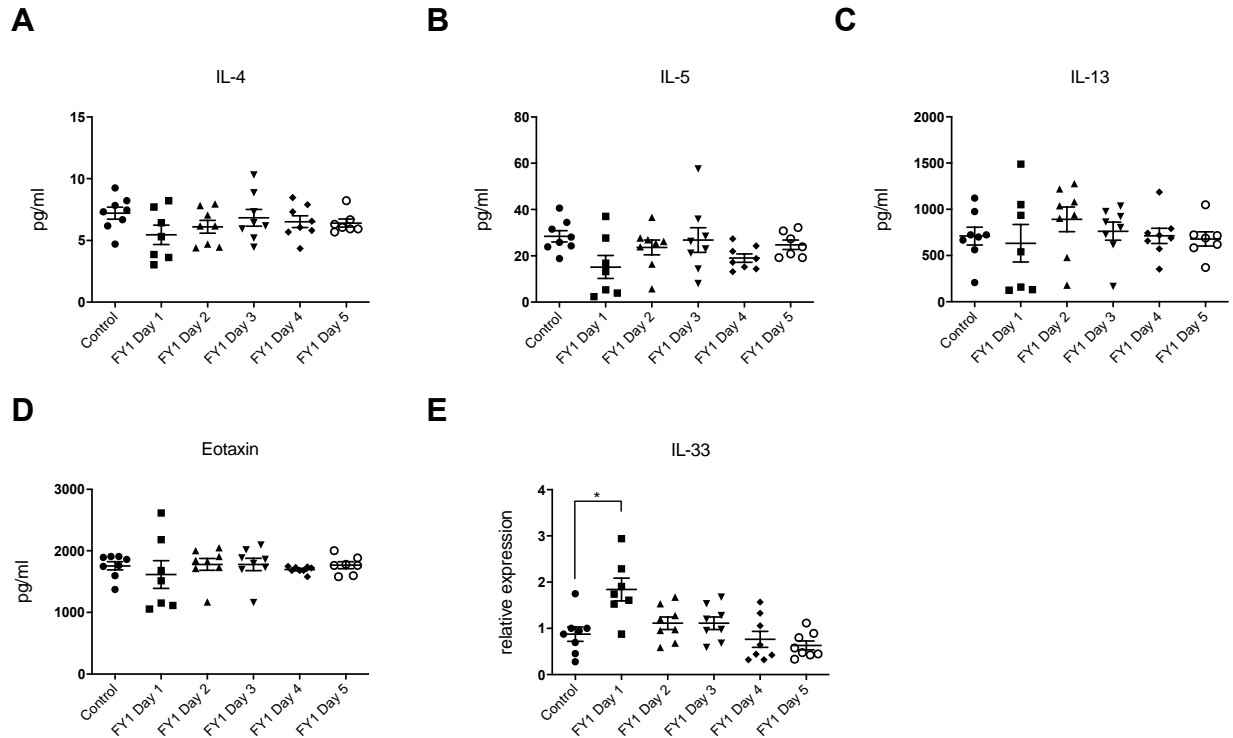

Supplemental Figure 2. **Influenza HA targeting monoclonal antibody inhibits IL-33 in the lung during influenza-associated bacterial pneumonia.** C57BL/6 mice infected with 100 PFU of influenza A PR/8/34 and receiving a single dose of FY1 or IgG control on Days 1-5 post-influenza infection. Mice received secondary infection with  $5 \times 10^7$  CFU of MRSA on Day 6 post-influenza and samples were harvested 24 hours following bacterial infection. A-D, Protein concentrations in lung tissue measured by Lincoplex (n=8). E, IL-33 gene expression in lung tissue measured by RT-PCR (n=8). Significance was tested by one-way ANOVA using Dunnett's multiple comparison test. Data represent mean  $\pm$  SEM.

## Supplemental Figure 3

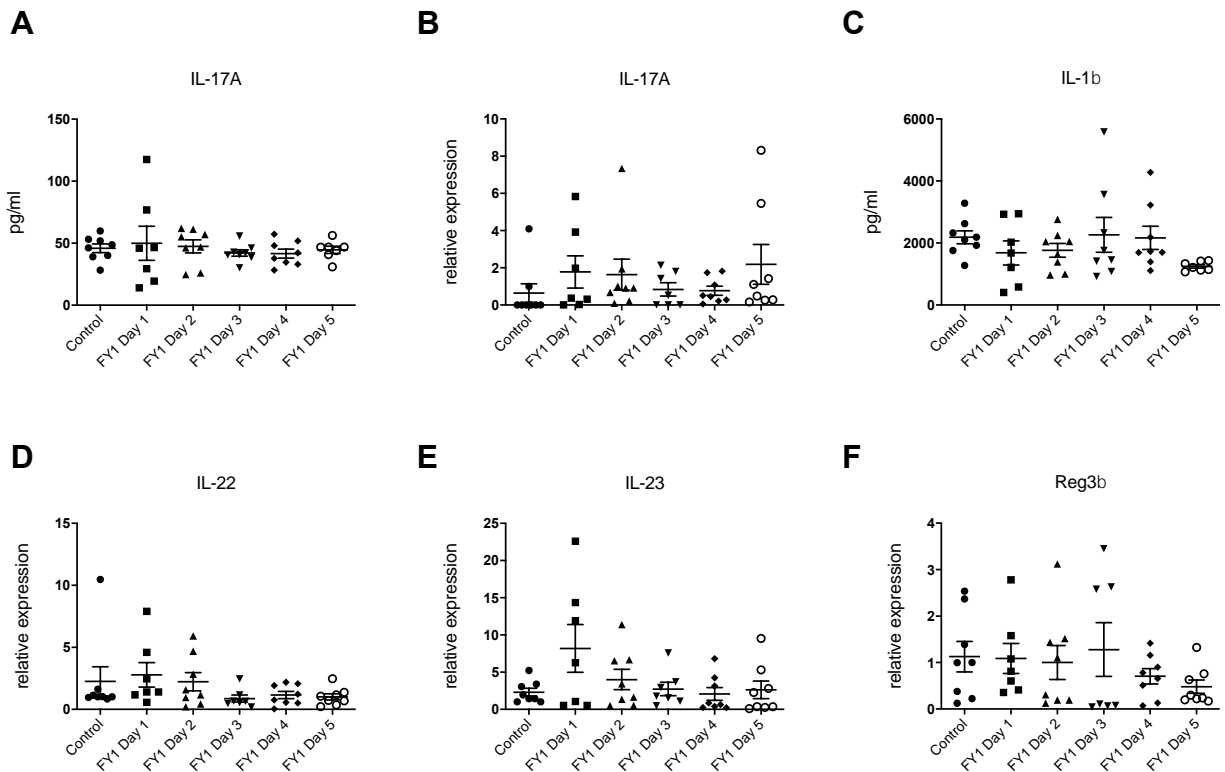

Supplemental Figure 3. **Influenza HA targeting monoclonal antibody does not alter Type 17 immunity in the lung during influenza-associated bacterial pneumonia.** C57BL/6 mice infected with 100 PFU of influenza A PR/8/34 and receiving a single dose of FY1 or IgG control on Days 1-5 post-influenza infection. Mice received secondary infection with  $5 \times 10^7$  CFU of MRSA on Day 6 post-influenza and samples were harvested 24 hours following bacterial infection. A-F, Type 17 immunity protein concentrations in lung tissue measured by Lincoplex and gene expression in lung tissue measured by RT-PCR (n=8). Significance was tested by one-way ANOVA using Dunnett's multiple comparison test. Data represent mean  $\pm$  SEM.

## Supplemental Figure 4

A

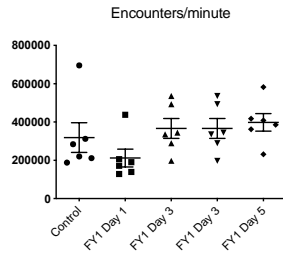

B

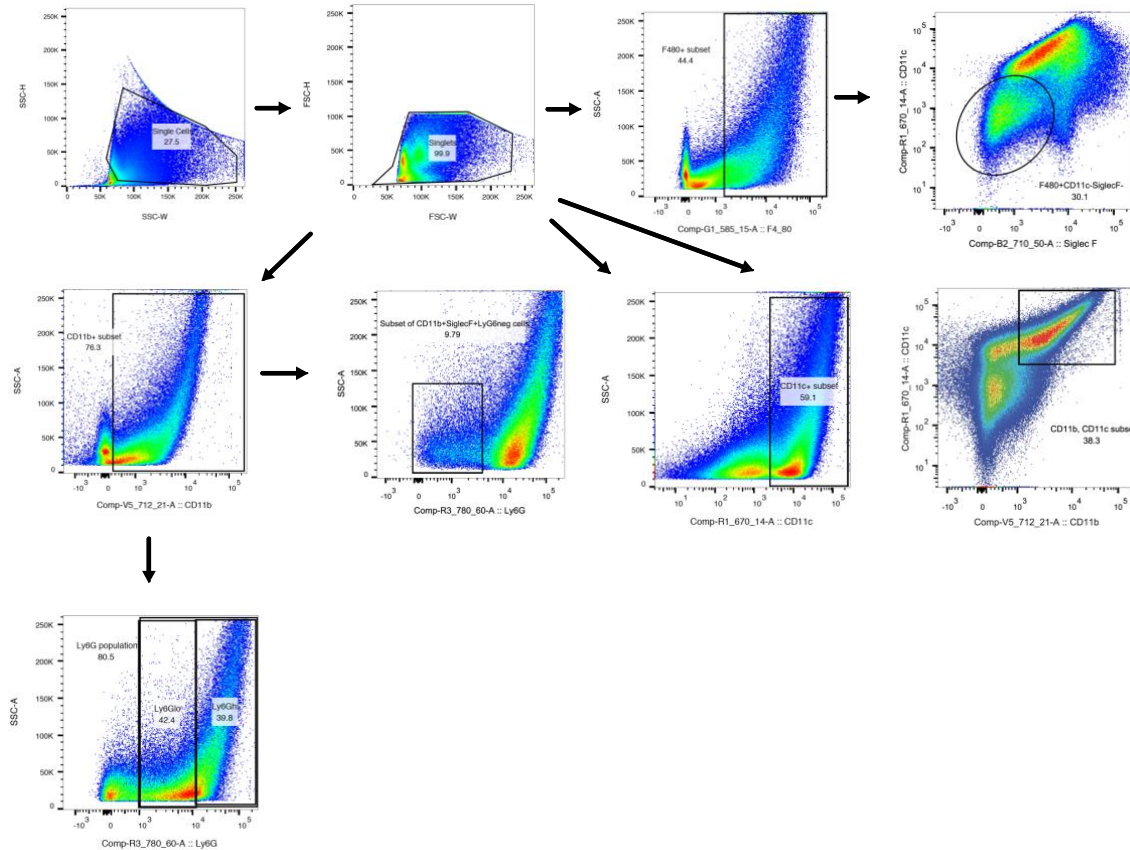

Supplemental Figure 4. **Flow cytometry gating of cell populations in the lung.** C57BL/6 mice infected with 100 PFU of influenza A PR/8/34 and received a single dose of FY1 on Days 1, 3, or 5 post-influenza infection. Mice received secondary infection with  $5 \times 10^7$  CFU of MRSA on Day 6 post-influenza and samples were harvested 24 hours following bacterial infection (n=6). A, Flow cytometry encounters per minute using the BD FACSARIA machine. B, Flow cytometry cell gating schematic.
